# Supplementary material for: What Matters When Exploring Fidelity in Interventions Using Health It to Reduce Disparities in Language-diverse Populations?”
Source: Research Square preprint supplement (doi:10.21203/rs.3.rs-106039/v1), 2020-11-17
Supplement: Supplementary file 1 [file eed5f4099de336f9a2e4ffc4.docx]

**Appendix 1: Summary of STAR MAMA Weekly Topics**

**MOM**

**BABY**

**Legend**

**Mom**

**Legend**

**Baby**


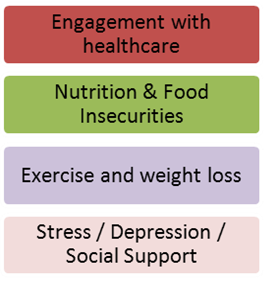

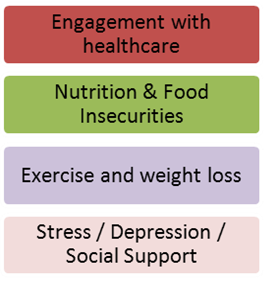

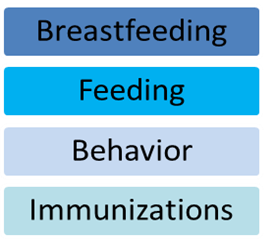

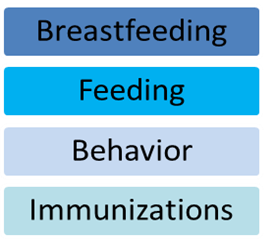


**MOM**

**Facts about Carbs-2**

**BABY**

**MOM**

**BABY**

**MOM**

**BABY**

**MOM**

**BABY**
